# Supplementary material
Source: publisher figshare collection journal article supplement (https://sage.figshare.com/ndownloader/files/22107762)
Supplement: Supplementary file 1 [file 22107762]

**Supplemental Table 2: Procedures considered cleft-related**

| Procedures |
| --- |
| Adenoids (full or partial)  Alveolar cleft repair (including associated fistula)  Bone Graft  Buttress corticotomy/Surgical palate expansion  Fistula repair  Hard palate repair  Labial frenulectomy  Le Fort (midface advancement)  Lingual frenulectomy  Lip repair  Lip scar revision  Mandibular distraction osteogenesis  Myringotomy  Pharyngeal flap (for speech)  Pre-maxillary setback  Prosthesis exchange  Prosthesis insertion  Prosthesis removal  Removal of MDO hardware  Revision Hard Palate Repair  Rhinoplasty  Soft palate adhesion  Soft Palate Repair (not z-Plasty)  Sphincter pharyngoplasty  Tongue lip adhesion  Tongue lip adhesion release  Tonsillectomy  Tracheostomy  Tympanoplasty  Z-plasty (Furlow) of soft palate  Other cleft-related surgeries |
